# Supplementary material for: On a neck, on a spit: controls on the shape of free spits
Source: Copernicus journal article supplement (doi:10.5194/esurf-4-193-2016), 2016-02-03
Supplement: Supplementary file 1 [file esurf-4-193-2016-supplement.zip]

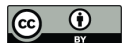

## *Supplement of*

# **On a neck, on a spit: controls on the shape of free spits**

**A. D. Ashton et al.**

*Correspondence to:* A. D. Ashton (aashton@whoi.edu)

- esurf-4-193-2016-supplement-title-page.pdf
- SpitMovies
  - AsymSpit.mov
  - SymMiddleSpit.mov
  - SymNarrowSpit.mov
  - SymWideSpit.mov

The copyright of individual parts of the supplement might differ from the CC-BY 3.0 licence.
